# Supplementary material
Source: Springer Nature journal article supplement (https://www.springermedizin.de/resource/supplementary/12891_2006_226_MOESM5_ESM.pdf/9510792)

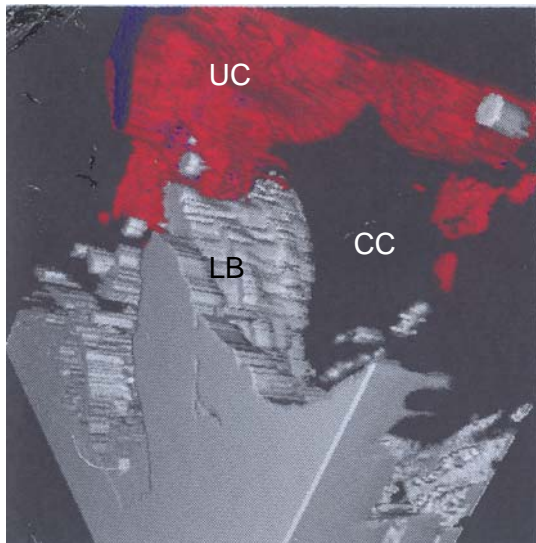

a

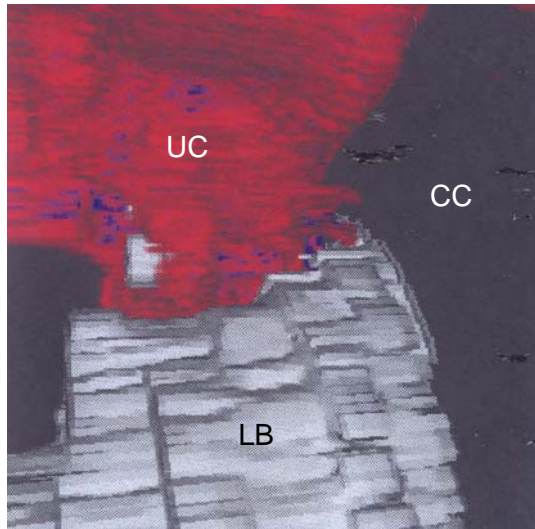

b

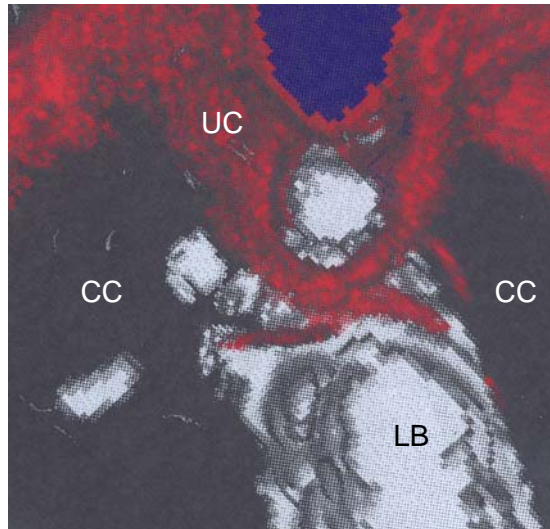

c

Supplement: MOESM5 [file 9510792]
